# Supplementary material
Source: publisher site journal article supplement (https://www.dovepress.com/article/533373)
Supplement: Supplementary file 1 [file 533373%20%252509Supplementary%20tables.docx]

Table S1. Knowledge dimension of the participants

|  | Correct | Mistake | Unsure |
| --- | --- | --- | --- |
| 1. The primary treatments for ovarian cancer include surgery and platinum-based chemotherapy regimens. | 281 (54.5) | 62 (12.0) | 173 (33.5) |
| 2. Myelosuppression is the most common hematologic toxicity induced by chemotherapy drugs. | 293 (56.8) | 67 (13.0) | 156 (30.2) |
| 3. Manifestations of myelosuppression include decreased neutrophils, reduced platelets, and lowered hemoglobin levels (anemia). | 271 (52.5) | 74 (14.3) | 171 (33.1) |
| 4. Neutropenia is the major adverse event caused by myelosuppressive chemotherapy drugs. | 276 (53.5) | 78 (15.1) | 162 (31.4) |
| 5. Febrile neutropenia (FN) is the most severe clinical complication. | 236 (45.7) | 115 (22.3) | 165 (32.0) |
| 6. Medications that frequently induce neutropenia can also lead to the occurrence of anemia, especially platinum-based drugs, after multiple chemotherapy sessions. | 260 (50.4) | 90 (17.4) | 166 (32.2) |
| 7. Besides medications, patient-related factors and the overall health status of the disease are crucial risk factors for inducing myelosuppression. | 303 (58.7) | 67 (13.0) | 146 (28.3) |
| 8. Before initiating the first chemotherapy cycle, a risk assessment for febrile neutropenia (FN) should be conducted. | 279 (54.1) | 74 (14.3) | 163 (31.6) |
| 9. Primary prevention involves the prophylactic use of G-CSF within 24 hours after the first administration of chemotherapy drugs for patients anticipated to experience severe neutropenia. | 273 (52.9) | 70 (13.6) | 173 (33.5) |
| 10. Among high-risk FN patients, primary prevention is the most cost-effective strategy. | 279 (54.1) | 74 (14.3) | 163 (31.6) |
| 11. For ovarian cancer patients receiving docetaxel chemotherapy (including taxane-resistant ovarian cancer patients, such as epithelial ovarian cancer), proactive use of G-CSF is recommended due to the high risk of FN. | 259 (50.2) | 80 (15.5) | 177 (34.3) |
| 12. Patients experiencing FN despite prophylactic G-CSF use may need to consider reducing chemotherapy doses or altering the chemotherapy regimen. | 286 (55.4) | 73 (14.1) | 157 (30.4) |
| 13. G-CSF administration should be initiated 24-72 hours after chemotherapy, with a prohibition on administration within 48 hours before or during chemotherapy. | 254 (49.2) | 82 (15.9) | 180 (34.9) |
| 14. The primary goal of treating neutropenia is to prevent and reduce the risks associated with neutropenia, including fever, infection, sepsis, and even death. | 278 (53.9) | 68 (13.2) | 170 (32.9) |
| 15. The objective of managing thrombocytopenia is to maintain platelets at a certain level and reduce the risk of bleeding. | 288 (55.8) | 73 (14.1) | 155 (30.0) |
| 16. Preventive and therapeutic approaches for anticancer drug-induced thrombocytopenia mainly include platelet-promoting drugs such as recombinant human thrombopoietin (rhTPO), rhIL-11, and direct platelet transfusion. | 292 (56.6) | 61 (11.8) | 163 (31.6) |
| 17. Preventive and therapeutic measures for anticancer drug-induced anemia include iron supplementation, folic acid, vitamin B12, EPO, and blood transfusion therapy. | 278 (53.9) | 64 (12.4) | 174 (33.7) |
| 18. Successful management of myelosuppression requires timely identification and intervention; hence, patient education and local monitoring are crucial. | 277 (53.7) | 63 (12.2) | 176 (34.1) |

Table S2. Attitude dimension of the participants

|  | Strongly Agree | Agree | Neutra | Disagree | Strongly disagree |
| --- | --- | --- | --- | --- | --- |
| 1. I believe the early prevention of myelosuppression after ovarian cancer chemotherapy is not very effective. | 85 (16.5) | 74 (14.3) | 86 (16.7) | 145 (28.1) | 126 (24.4) |
| 2. I believe that ovarian cancer-induced myelosuppression can bring serious consequences to patients, even threatening their life safety. Therefore, once it has occurred, chemotherapy should not be administered again. | 87 (16.9) | 77 (14.9) | 72 (14.0) | 147 (28.5) | 133 (25.8) |
| 3. I believe that the use of G-CSF as primary prevention in clinical practice can greatly alleviate the occurrence of myelosuppression. | 113 (21.9) | 132 (25.6) | 74 (14.3) | 82 (15.9) | 115 (22.3) |
| 4. I believe that the current clinical treatment of myelosuppression after ovarian cancer chemotherapy is effective. | 127 (24.6) | 143 (27.7) | 73 (14.1) | 96 (18.6) | 77 (14.9) |
| 5. I believe that regardless of the risk, we should be vigilant about the occurrence of myelosuppression after chemotherapy. | 164 (31.8) | 109 (21.1) | 60 (11.6) | 95 (18.4) | 88 (17.1) |
| 6. I believe that timely identification and intervention for myelosuppression can effectively control and alleviate it, improving patient prognosis. | 158 (30.6) | 96 (18.6) | 74 (14.3) | 94 (18.2) | 94 (18.2) |
| 7. I believe that patient education is crucial for managing myelosuppression, and it is necessary to inform patients about the risks and control measures of myelosuppression before and after each chemotherapy session. | 179 (34.7) | 97 (18.8) | 76 (14.7) | 86 (16.7) | 78 (15.1) |

Questions A3-A7 are positive attitudes, and A1-A2 are negative attitudes.

Table S3. Practice dimension of the participants.

|  | Always | Often | Sometimes | Occasionally | Never |
| --- | --- | --- | --- | --- | --- |
| 1. I assess the risk of myelosuppression for patients before each chemotherapy session. | 180 (34.9) | 96 (18.6) | 165 (32.0) | 75 (14.5) | 0 (0.0) |
| 2. I thoroughly explain the potential risk of myelosuppression to patients before each chemotherapy session. | 202 (39.1) | 104 (20.2) | 150 (29.1) | 60 (11.6) | 0 (0.0) |
| 3. Based on the risk assessment results for myelosuppression in patients, I adjust (or advise the doctor to adjust) the chemotherapy dosage or regimen. | 161 (31.2) | 105 (20.3) | 168 (32.6) | 82 (15.9) | 0 (0.0) |
| 4. I recommend the prophylactic use of G-CSF for chemotherapy patients. | 150 (29.1) | 112 (21.7) | 185 (35.9) | 69 (13.4) | 0 (0.0) |
| 5. For patients who have not received prophylactic G-CSF, I assess the risk of therapeutic use of rhG-CSF. | 150 (29.1) | 104 (20.2) | 180 (34.9) | 82 (15.9) | 0 (0.0) |
| 6. For tumor patients at high risk of bleeding, when the platelet count is ≤ 10×109/L, I recommend prophylactic platelet transfusion. | 158 (30.6) | 105 (20.3) | 182 (35.3) | 71 (13.8) | 0 (0.0) |
| 7. During chemotherapy, I inform patients that they should have a weekly complete blood count (CBC) check. | 209 (40.5) | 92 (17.8) | 165 (32.0) | 50 (9.7) | 0 (0.0) |
| 8. I inform patients that they should undergo a CBC test on days 8-14 of chemotherapy and measure their temperature after chemotherapy. | 185 (35.9) | 101 (19.6) | 148 (28.7) | 82 (15.9) | 0 (0.0) |
| 9. For patients with potential risk of myelosuppression, I promptly conduct follow-up through phone calls or other means. | 157 (30.4) | 119 (23.1) | 159 (30.8) | 81 (15.7) | 0 (0.0) |
| 10. I proactively monitor or participate in research on myelosuppression after chemotherapy for ovarian cancer. | 160 (31.0) | 108 (20.9) | 183 (35.5) | 65 (12.6) | 0 (0.0) |

**Table S4.** Gender distribution is different in different positions

| Gender | Gynecologists | Oncologists | Gynecology nurses | Oncology nurses | P |
| --- | --- | --- | --- | --- | --- |
| Male | 73 (34.93%) | 68 (57.63%) | 14 (16.67%) | 27 (25.71%) | <0.001 |
| Female | 136 (65.07%) | 50 (42.37%) | 70 (83.33%) | 78 (74.29%) |

**Table S5.** Gender practice score differences between men and women in different positions

| Gender | Gynecologists | Oncologists | Gynecology nurses | Oncology nurses |
| --- | --- | --- | --- | --- |
| Male | 30 (25,41) | 30 (26,37.5) | 44.5 (42,46) | 43 (32,46) |
| Female | 43 (34.5,48) | 34 (30,43) | 41.5 (33,49) | 37 (28,46) |
| P | <0.001 | 0.003 | 0.219 | 0.266 |

Table S6. Correlation analysis of KAP scores.

|  | Knowledge | Attitude | Practice |
| --- | --- | --- | --- |
| Knowledge | 1.000 |  |  |
| Attitude | 0.728 (P<0.001) | 1.000 |  |
| Practice | 0.742 (P<0.001) | 0.743 (P<0.001) | 1.000 |
